# Supplementary material for: Novel Formulations of C-Peptide with Long-Acting Therapeutic Potential for Treatment of Diabetic Complications
Source: MDPI journal article supplement (doi:10.3390/pharmaceutics11010027), 2019-01-11
Supplement: s1 [file s1]

# Supplementary Materials: Novel Formulations of C-Peptide with Long-Acting Therapeutic Potential for Treatment of Diabetic Complications

Natalia Zashikhina, Vladimir Sharoyko, Mariia Antipchik, Irina Tarasenko, Yurii Anufrikov, Antonina Lavrentieva, Tatiana Tennikova and Evgenia Korzhikova-Vlakh

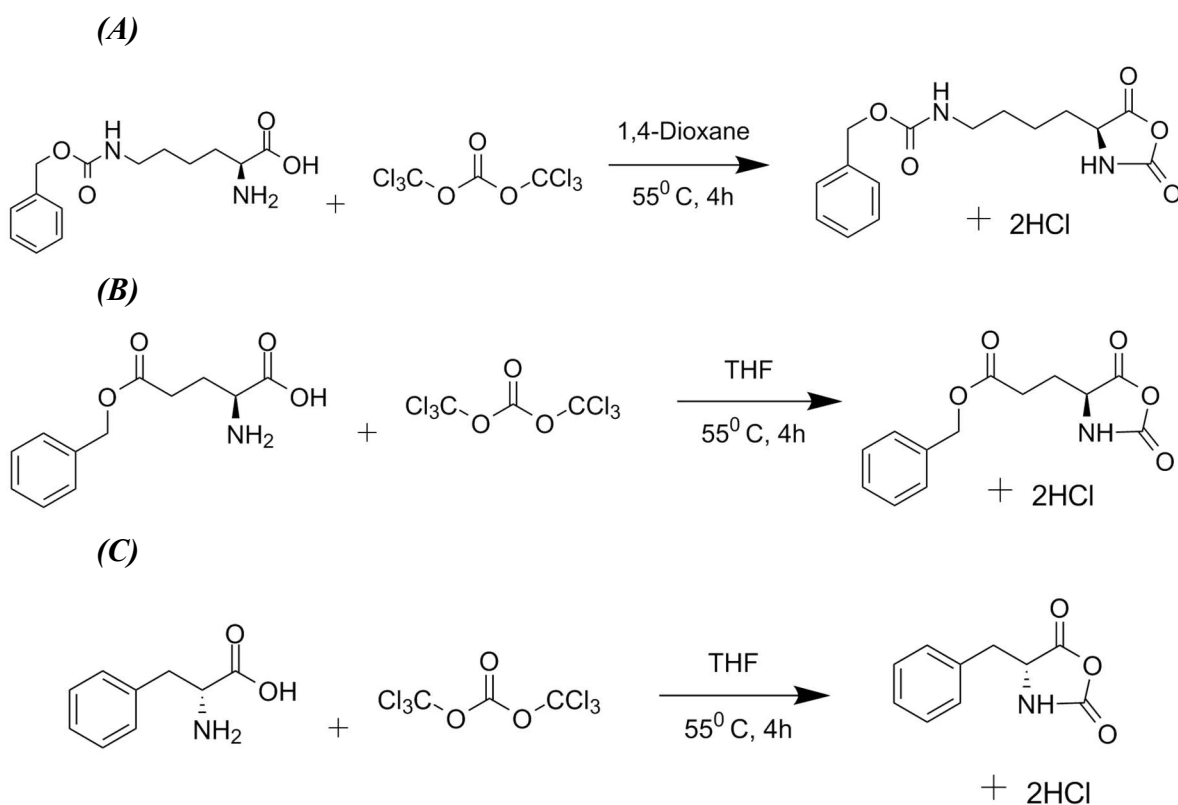

**Figure S1.** Scheme of synthesis of NCAs of  $\gamma$ -Bzl-L-Glu (A),  $\epsilon$ -Z-L-Lys (B) and D-Phe (C).

(A)

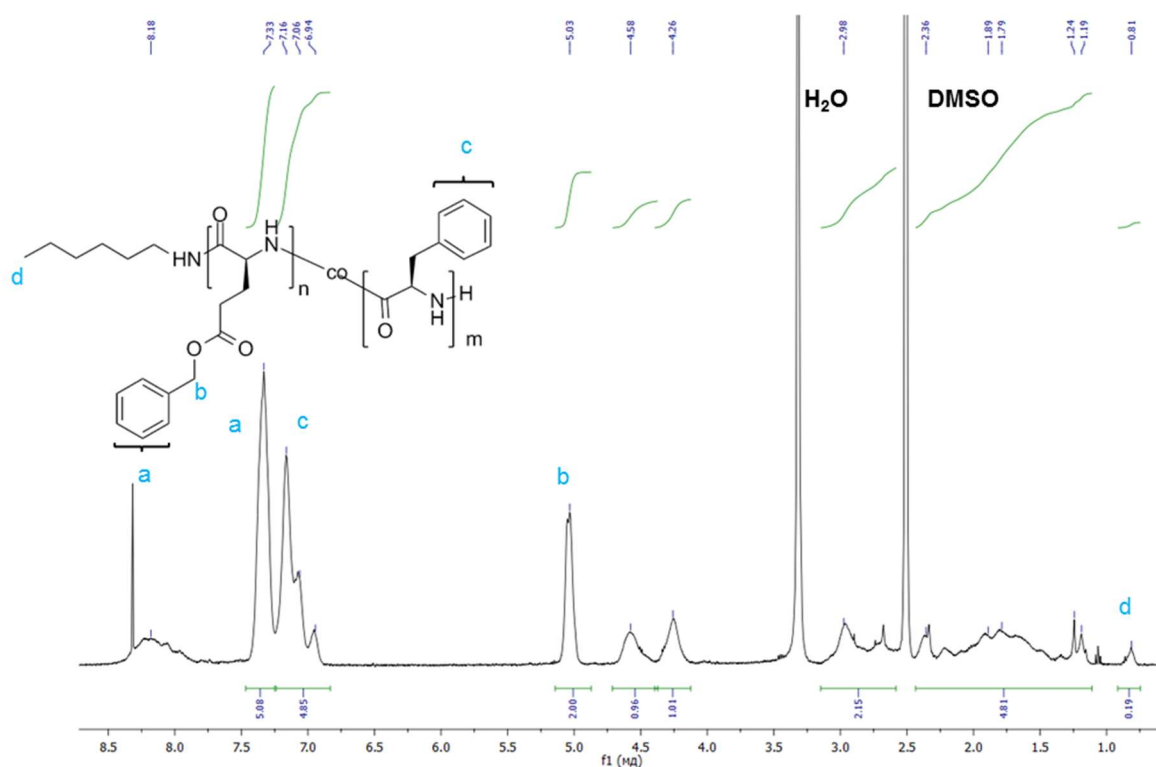

(B)

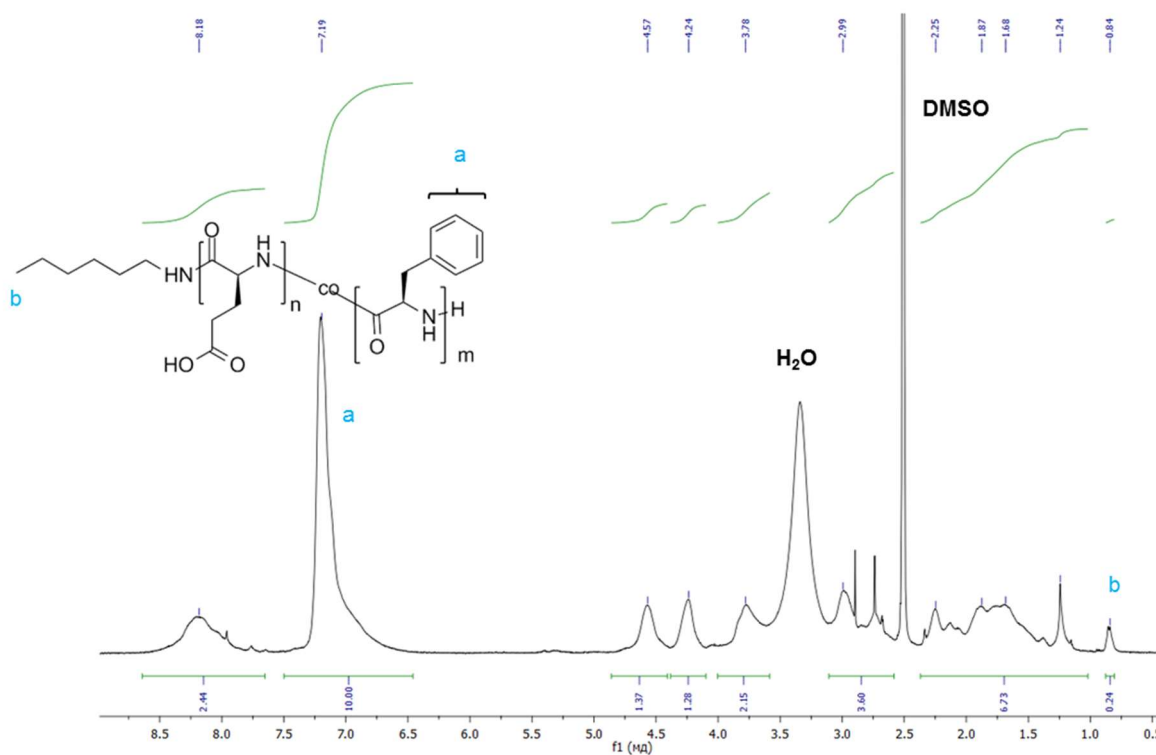

**Figure S2.** <sup>1</sup>H NMR spectra of P(Glu(OBzl)-co-Phe) (A) and P(Glu-co-Phe) (B) obtained after deprotection of  $\gamma$ -glutamic carboxyls.
